# Supplementary material for: Face-to-face physiotherapy compared with a supported home exercise programme for the management of musculoskeletal conditions: protocol of a multicentre, randomised controlled trial—the REFORM trial
Source: PubMed Central journal article supplement — BMJ Open. 2021 May 18;11(5):e041242. doi: 10.1136/bmjopen-2020-041242 (PMC8130735; doi:10.1136/bmjopen-2020-041242), 2021-05-18
Supplement: bmjopen-2020-041242supp001.pdf [file bmjopen-2020-041242supp001.pdf]

Withers HG, Glinsky JV, Chu J, et al. *Face-to-face physiotherapy compared with a supported home exercise programme for the management of musculoskeletal conditions: Protocol of a multicentre, randomised controlled trial - the REFORM trial.* *BMJ Open* 2021;1-7.

## SUPPLEMENTARY FILE

**Table 1:** Timeline for the study.

| Phase                           | Objective                                                                                                | Planned Completion Date                                                                                                                                                                                                                       |
|---------------------------------|----------------------------------------------------------------------------------------------------------|-----------------------------------------------------------------------------------------------------------------------------------------------------------------------------------------------------------------------------------------------|
| Preparation                     | Finalise protocol<br>Submit to ethics<br>Finalise CRF<br>Complete Database                               | From October 2016                                                                                                                                                                                                                             |
| Recruitment                     | Commence Recruitment                                                                                     | April 2019                                                                                                                                                                                                                                    |
| Dissemination                   | Publish Protocol                                                                                         | May 2021                                                                                                                                                                                                                                      |
| Recruitment and data collection | Continue recruitment<br>Collect data from 6 week and 26-week assessments<br>Recruit 100% of participants | April 2019 to Dec 2020<br><u>Due to COVID -19 recruitment was stopped in March 2020, and was resumed in July 2020. Recruitment was severely limited until December 2020. Currently n=141. Revised planned completion date: December 2021.</u> |
| Analysis                        | Clean and lock data base<br>Complete Analysis<br>Submit papers for publication                           | From December 2021                                                                                                                                                                                                                            |
| Dissemination                   | Present results at seminars, conferences<br>Disseminate results into policy and practice                 | From December 2021                                                                                                                                                                                                                            |

Withers HG, Glinsky JV, Chu J, et al. *Face-to-face physiotherapy compared with a supported home exercise programme for the management of musculoskeletal conditions: Protocol of a multicentre, randomised controlled trial - the REFORM trial.* *BMJ Open* 2021;1-7.

**Table 2:** Text messages sent each week to the Supported Home exercise Group. All participants randomised to the Supported Home Exercise Group will receive the following text messages each week of their 6-week exercise program.

|                          |                                                                          |
|--------------------------|--------------------------------------------------------------------------|
| <b>Week One</b>          | "You've got the hang of all your exercises, keep it up."                 |
| <b>Week Two</b>          | "You're doing well. Remember to complete your exercises each day."       |
| <b>Week Three</b>        | "All of your effort will pay off in the long run. Keep exercising!"      |
| <b>Week Four</b>         | "You're already half way through. Keep up the hard work."                |
| <b>Week Five</b>         | "Almost there. One week to go. Keep going with recording your exercises" |
| <b>Week Six</b>          | "Well done! You have completed 6 weeks of home exercises!"               |
| <b>Week Six Reminder</b> | "Your 6-week phone call is coming up!"                                   |
| <b>Week 26 Reminder</b>  | "Reminder! Your 26-week call is coming in the next few days."            |

Withers HG, Glinsky JV, Chu J, et al. *Face-to-face physiotherapy compared with a supported home exercise programme for the management of musculoskeletal conditions: Protocol of a multicentre, randomised controlled trial - the REFORM trial.* *BMJ Open* 2021;1–7.

**Table 3:** Description of the intervention based on the TIDieR checklist.

|                                   | <b>Intervention group<br/>(Supported Home Exercise)</b>                                                                                                                                                                                                                                                                             | <b>Control group<br/>(Face-to-Face therapy)</b>                                                                                                                                                                               |
|-----------------------------------|-------------------------------------------------------------------------------------------------------------------------------------------------------------------------------------------------------------------------------------------------------------------------------------------------------------------------------------|-------------------------------------------------------------------------------------------------------------------------------------------------------------------------------------------------------------------------------|
| <b>Setting</b>                    | Home                                                                                                                                                                                                                                                                                                                                | Hospital out-patients clinic                                                                                                                                                                                                  |
| <b>Why</b>                        | Exercise, support and advice are considered core components of management for most musculoskeletal conditions. Exercise can be provided remotely as part of a home exercise program while support and advice can be provided over the telephone.                                                                                    | Pragmatic trial design                                                                                                                                                                                                        |
| <b>Materials for therapists</b>   | A detailed protocol outlining the trial procedures. Knowledge on accessing and devising and exercise programme using <a href="http://www.physiotherapyexercises.com">www.physiotherapyexercises.com</a> and creating an App to monitor adherence. Programming text messages using a website. Study phone for follow up phone calls. | A detailed protocol. Providing physiotherapy in a public hospital outpatient setting.                                                                                                                                         |
| <b>Materials for participants</b> | Device such as a smart phone or tablet. Access to the internet. Participants are provided with an exercises programme and an App to monitor adherence.                                                                                                                                                                              | Participants are provided with outpatient usual care.                                                                                                                                                                         |
| <b>Who provided</b>               | Trial physiotherapist who is a PhD candidate at University of Sydney.                                                                                                                                                                                                                                                               | Physiotherapists employed at the study site hospitals.                                                                                                                                                                        |
| <b>How</b>                        | Initial face-to-face session for assessment and exercise prescription.                                                                                                                                                                                                                                                              | Face-to-face physiotherapy consisting of usual care.                                                                                                                                                                          |
| <b>Where</b>                      | Initially on site in a study hospital in the outpatient department, then in the participants' home environment.                                                                                                                                                                                                                     | Onsite at a study hospital in the outpatient department.                                                                                                                                                                      |
| <b>When and how much</b>          | One initial session lasting approximately one hour. Participants are asked to exercise on their own each day. The trial physiotherapist will call at week 2 and week 4 to monitor adherence and give support and advice.                                                                                                            | One initial session lasting approximately one hour. Regular face-to-face physiotherapy sessions of up to one hour per session. The frequency is determined by the treating physiotherapist but can be up to 3 times per week. |
| <b>Tailoring</b>                  | Each participant is prescribed an individualised exercise programme following an initial assessment by the trial physiotherapist.                                                                                                                                                                                                   | Determined by the outpatient physiotherapist.                                                                                                                                                                                 |

Withers HG, Glinsky JV, Chu J, et al. *Face-to-face physiotherapy compared with a supported home exercise programme for the management of musculoskeletal conditions: Protocol of a multicentre, randomised controlled trial - the REFORM trial*. *BMJ Open* 2021;1–7.

**Table 4:** Visit schedule for study

|                                                                                                                                                                                                                                                                                                                                              | Enrolment   | B/L Assessment | Allocation |             |                    |             |                    |             |             | Week 6 Assessment | HEQs   | Week 26 Assessment |
|----------------------------------------------------------------------------------------------------------------------------------------------------------------------------------------------------------------------------------------------------------------------------------------------------------------------------------------------|-------------|----------------|------------|-------------|--------------------|-------------|--------------------|-------------|-------------|-------------------|--------|--------------------|
|                                                                                                                                                                                                                                                                                                                                              | Day -7 to 0 | Day 0          | Day 0      | Week 1      | Week 2             | Week 3      | Week 4             | Week 5      | Week 6      | Week 6            | Week 6 | Week 26            |
| Visit Activity                                                                                                                                                                                                                                                                                                                               |             | Clinic         |            |             |                    |             |                    |             |             | Ph                | Ph     | Ph                 |
| Eligibility                                                                                                                                                                                                                                                                                                                                  | ✓           |                |            |             |                    |             |                    |             |             |                   |        |                    |
| Informed Consent                                                                                                                                                                                                                                                                                                                             | ✓           |                |            |             |                    |             |                    |             |             |                   |        |                    |
| Randomisation allocation                                                                                                                                                                                                                                                                                                                     |             |                | ✓          |             |                    |             |                    |             |             |                   |        |                    |
| Face-to-face Physiotherapy                                                                                                                                                                                                                                                                                                                   |             |                |            | ✓           | ✓                  | ✓           | ✓                  | ✓           | ✓           |                   | ✓      |                    |
| Supported Home Exercise                                                                                                                                                                                                                                                                                                                      |             |                |            | ✓<br>(Text) | ✓<br>(Text/<br>ph) | ✓<br>(Text) | ✓<br>(Text/<br>ph) | ✓<br>(Text) | ✓<br>(Text) |                   | ✓      |                    |
| <b>ASSESSMENTS</b>                                                                                                                                                                                                                                                                                                                           |             |                |            |             |                    |             |                    |             |             |                   |        |                    |
| PSFS                                                                                                                                                                                                                                                                                                                                         |             | ✓              |            |             |                    |             |                    |             |             | ✓                 |        | ✓                  |
| TSK                                                                                                                                                                                                                                                                                                                                          |             | ✓              |            |             |                    |             |                    |             |             | ✓                 |        | ✓                  |
| Pain                                                                                                                                                                                                                                                                                                                                         |             | ✓              |            |             |                    |             |                    |             |             | ✓                 |        | ✓                  |
| PGIC                                                                                                                                                                                                                                                                                                                                         |             | ✓              |            |             |                    |             |                    |             |             | ✓                 |        | ✓                  |
| PSHCSD                                                                                                                                                                                                                                                                                                                                       |             | ✓              |            |             |                    |             |                    |             |             | ✓                 |        | ✓                  |
| EuroQol-5D                                                                                                                                                                                                                                                                                                                                   |             | ✓              |            |             |                    |             |                    |             |             | ✓                 |        | ✓                  |
| LLFDI – function                                                                                                                                                                                                                                                                                                                             |             | ✓              |            |             |                    |             |                    |             |             | ✓                 |        | ✓                  |
| LLFDI – disability (freq)                                                                                                                                                                                                                                                                                                                    |             | ✓              |            |             |                    |             |                    |             |             | ✓                 |        | ✓                  |
| LLFDI – disability (capability)                                                                                                                                                                                                                                                                                                              |             | ✓              |            |             |                    |             |                    |             |             | ✓                 |        | ✓                  |
| AEs                                                                                                                                                                                                                                                                                                                                          |             |                |            |             |                    |             |                    |             |             | ✓                 |        | ✓                  |
| Abbreviations: PSFS: Patient specific functional scale. TSK: Tampa Scale for Kinesiophobia. PGIC: Patient Global impression of Change. PSHCSD: Patient Satisfaction with Health Care Service Delivery. LLFDI: Late Life Function and Disability Instrument. AEs: Adverse Events. PH: Phone. B/L: Baseline. HEQs: Health Economics Questions. |             |                |            |             |                    |             |                    |             |             |                   |        |                    |
